# Supplementary material
Source: PubMed Central journal article supplement (PMC7217728)

## Supplementary Information

### Pyruvate MID measurements dramatically improve precision of PK flux estimates

A previous  $^{13}\text{C}$  flux analysis of SA590 (–thiamin) reported low PK flux and diversion of PEP into a three-step bypass pathway involving the enzymes PEP carboxylase (PEPC), malate dehydrogenase (MDH), and malic enzyme (ME) (Jazmin et al., 2017). However, Jazmin et al. were unable to detect pyruvate MIDs by GC-MS analysis of MOX-TMS derivatives. Since pyruvate is the product of PK, we hypothesized that direct measurement of pyruvate MIDs would improve our ability to accurately estimate PK flux. To address this issue, we performed  $^{13}\text{C}$  flux analysis of SA590 (+thiamin) based on GC-MS of MOX-TBDMS derivatives, which provide reproducible pyruvate MID measurements through assessment of the PYR174 fragment ion (**Fig. S6**). Although the derivatization method and experimental conditions (+/– thiamin, as well as light intensity and culture volume) were different, the flux estimates obtained from the two studies were largely consistent (**Fig. S7**). There were significant differences in flux estimates from 3PGA to pyruvate and from pyruvate to IBA, as expected due to differences in IBA productivity of the two cultures. Significantly, the SA590 (+thiamin) study determined a high PK flux estimate, while the SA590 (–thiamin) study determined a low PK flux and high flux through the three-step PK bypass pathway (PPC  $\rightarrow$  MDH  $\rightarrow$  ME). Flux to IBA (via the ALS reaction) was approximately doubled in the SA590 (+thiamin) condition, which was also associated with increased enolase (ENO) flux from 3PGA to PEP.

To further test the sensitivity of each best-fit solution to variations in PK flux, we constrained the PK flux to zero in the INST-MFA model and regressed both the MOX-TBDMS measurements (from SA590, +thiamin) and the prior MOX-TMS measurements (from SA590, –thiamin) to determine whether the adjusted model could still achieve an acceptable fit. We assessed the lack-of-fit between the simulated and experimentally measured MIDs by calculating the sum of squared residuals (SSR) for each best-fit solution. Constraining the INST-MFA model to a low PK flux solution while regressing the MOX-TBDMS measurements increased the SSR beyond the upper limit of the acceptable range (**Fig. S8A**). The PYR174 and MAL419 MID measurements were the major contributors to the overall lack-of-fit (**Fig. S8B**). MOX-TMS measurements, on the other hand, were not as sensitive to variations in PK flux (**Fig. S8C**), and the SSR remained within the acceptable range for both high and low PK flux solutions (**Fig. S8A**).

In summary, we found that the MOX-TBDMS measurements used in our current study are more sensitive to variations in PK flux than the MOX-TMS measurements used in our prior study, largely because the MOX-TBDMS derivatives enable accurate assessment of pyruvate MIDs. Although the two studies were conducted under different experimental conditions, the limited sensitivity to discriminate between pyruvate-producing pathways using MOX-TMS derivatives could also have contributed to the variability in PK flux estimates between the two studies. These results led us to conclude that pyruvate MID measurements are essential for precise determination of PK flux.

**Table S1. Net fluxes determined by <sup>13</sup>C INST-MFA in SA590 (+thiamin), SA590-PK (-thiamin), and SA590-PK (+thiamin).** Estimated flux values ( $\mu\text{mol gDW}^{-1} \text{h}^{-1}$ ) and 95% confidence bounds are shown (n=3). The specific growth rate is specified in units of  $\text{h}^{-1}$ .

| Strain (condition)        |                                                                                                                                                          | SA590 (+thiamin) |       |       | SA590-PK (-thiamin) |       |       | SA590-PK (+thiamin) |       |       |
|---------------------------|----------------------------------------------------------------------------------------------------------------------------------------------------------|------------------|-------|-------|---------------------|-------|-------|---------------------|-------|-------|
| Reaction name             | Reaction                                                                                                                                                 | Value            | LB95  | UB95  | Value               | LB95  | UB95  | Value               | LB95  | UB95  |
| RUBISCO_CO2               | RUBP + CO2 -> 3PGA + 3PGA                                                                                                                                | 1428             | 1314  | 1554  | 1302                | 1236  | 1392  | 1554                | 1428  | 1668  |
| GAPDH                     | 3PGA -> TP                                                                                                                                               | 2484             | 2298  | 2718  | 2256                | 2142  | 2688  | 2676                | 2460  | 3156  |
| ALD                       | TP + E4P -> SBP                                                                                                                                          | 480              | 438   | 522   | 438                 | 420   | 522   | 498                 | 474   | 594   |
| SBP                       | SBP -> S7P                                                                                                                                               | 480              | 438   | 522   | 438                 | 420   | 522   | 498                 | 474   | 594   |
| FBA net                   | TP + TP <-> FBP                                                                                                                                          | 516              | 474   | 612   | 462                 | 438   | 540   | 582                 | 504   | 684   |
| PFK net                   | FBP <-> F6P                                                                                                                                              | 516              | 474   | 612   | 462                 | 438   | 540   | 582                 | 504   | 684   |
| TK1 net                   | TP + EC2 <-> X5P                                                                                                                                         | 972              | 894   | 1062  | 888                 | 846   | 1062  | 1008                | 960   | 1224  |
| TK2 net                   | S7P <-> R5P + EC2                                                                                                                                        | 480              | 438   | 522   | 438                 | 420   | 522   | 498                 | 474   | 594   |
| TK3 net                   | F6P <-> E4P + EC2                                                                                                                                        | 492              | 444   | 534   | 450                 | 426   | 534   | 510                 | 480   | 606   |
| PPE net                   | X5P <-> RU5P                                                                                                                                             | 972              | 894   | 1062  | 888                 | 846   | 1062  | 1008                | 960   | 1224  |
| PPI net                   | R5P <-> RU5P                                                                                                                                             | 462              | 426   | 504   | 426                 | 408   | 510   | 486                 | 462   | 582   |
| PRK                       | RU5P -> RUBP                                                                                                                                             | 1434             | 1314  | 1560  | 1308                | 1242  | 1566  | 1554                | 1440  | 1854  |
| PGI net                   | F6P <-> G6P                                                                                                                                              | 27               | 24    | 216   | 11                  | 10    | 108   | 78                  | 18    | 120   |
| G6PDH                     | G6P -> RU5P + CO2                                                                                                                                        | 0                | 0     | 90    | 10                  | 0     | 28    | 59                  | 0     | 84    |
| RUBISCO_O2                | RUBP -> 3PGA + 2PG                                                                                                                                       | 2                | 1     | 72    | 7                   | 0     | 174   | 2                   | 0     | 210   |
| PGP                       | 2PG -> GLY                                                                                                                                               | 2                | 1     | 72    | 7                   | 0     | 174   | 2                   | 0     | 210   |
| GDC                       | GLY + GLY -> SER + CO2                                                                                                                                   | 1                | 0     | 35    | 3                   | 0     | 90    | 1                   | 0     | 108   |
| SGA                       | SER -> GA                                                                                                                                                | 1                | 0     | 35    | 3                   | 0     | 90    | 1                   | 0     | 108   |
| GK net                    | GA <-> 3PGA                                                                                                                                              | 1                | 0     | 35    | 3                   | 0     | 90    | 1                   | 0     | 108   |
| ENO net                   | 3PGA <-> PEP                                                                                                                                             | 348              | 324   | 372   | 336                 | 324   | 354   | 408                 | 390   | 432   |
| PK                        | PEP -> PYR                                                                                                                                               | 234              | 222   | 276   | 276                 | 258   | 288   | 336                 | 312   | 372   |
| ALS                       | PYR + PYR -> AcLAC + CO2                                                                                                                                 | 66               | 59    | 66    | 84                  | 78    | 90    | 132                 | 120   | 138   |
| KIV1                      | AcLAC -> IBA + CO2                                                                                                                                       | 66               | 59    | 66    | 84                  | 78    | 90    | 132                 | 120   | 138   |
| PDH                       | PYR -> ACA + CO2                                                                                                                                         | 114              | 102   | 126   | 84                  | 78    | 90    | 78                  | 72    | 78    |
| CS                        | OAA + ACA -> CIT                                                                                                                                         | 28               | 25    | 31    | 22                  | 20    | 23    | 19                  | 18    | 20    |
| ACO net                   | CIT <-> ICI                                                                                                                                              | 28               | 25    | 31    | 22                  | 20    | 23    | 19                  | 18    | 20    |
| IDH                       | ICI -> AKG + CO2                                                                                                                                         | 28               | 25    | 31    | 22                  | 20    | 23    | 19                  | 18    | 20    |
| FUM net                   | FUM <-> MAL                                                                                                                                              | 16               | 14    | 17    | 12                  | 11    | 13    | 11                  | 10    | 11    |
| MDH net                   | OAA <-> MAL                                                                                                                                              | 14               | -17   | 20    | -12                 | -13   | -10   | 6                   | -11   | 24    |
| ME                        | MAL -> PYR + CO2                                                                                                                                         | 30               | 0     | 37    | 0                   | 0     | 2     | 17                  | 0     | 35    |
| PPC                       | PEP + CO2 -> OAA                                                                                                                                         | 90               | 56    | 96    | 46                  | 43    | 49    | 57                  | 39    | 72    |
| Growth (h <sup>-1</sup> ) | 0.715*R5P + 3.624*ACA + 1.191*G6P + 0.501*E4P + 1.205*3PGA + 1.002*PEP + 1.197*PYR + 2.039*OAA + 1.233*AKG + 0.133*TP + 1.017*CO2 -> Biomass + 0.683*FUM | 0.023            | 0.021 | 0.025 | 0.018               | 0.016 | 0.019 | 0.015               | 0.015 | 0.016 |

**Table S2. Exchange fluxes determined by <sup>13</sup>C INST-MFA in SA590 (+thiamin), SA590-PK (-thiamin), and SA590-PK (+thiamin).** The exchange flux is the minimum of the forward and backward fluxes of a reversible reaction. Estimated flux values are scaled according to the transformation  $v_{exch}^{[0,100]} = \frac{v_{exch}}{v_{ref} + v_{exch}} \times 100$ , where  $v_{ref}$  is net CO<sub>2</sub> assimilation rate (Wiechert and de Graaf, 1997). 95% confidence bounds are shown for each strain/condition (n=3). Note that PGM, GS, SDH, ALT, LDH, and CBS reactions allow for reversible exchange without net flux in either direction.

| Strain (condition) |                   | SA590 (+thiamin) |      |      | SA590-PK (-thiamin) |      |      | SA590-PK (+thiamin) |      |      |
|--------------------|-------------------|------------------|------|------|---------------------|------|------|---------------------|------|------|
| Reaction name      | Reaction          | Value            | LB95 | UB95 | Value               | LB95 | UB95 | Value               | LB95 | UB95 |
| FBA exch           | TP + TP <-> FBP   | 0                | 0    | 100  | 0                   | 0    | 24   | 0                   | 0    | 100  |
| PFK exch           | FBP <-> F6P       | 0                | 0    | 100  | 100                 | 0    | 100  | 100                 | 0    | 100  |
| TK1 exch           | TP + EC2 <-> X5P  | 100              | 0    | 100  | 100                 | 0    | 100  | 0                   | 0    | 100  |
| TK2 exch           | S7P <-> R5P + EC2 | 95               | 0    | 100  | 0                   | 0    | 100  | 100                 | 0    | 100  |
| TK3 exch           | F6P <-> E4P + EC2 | 100              | 0    | 100  | 0                   | 0    | 100  | 50                  | 0    | 100  |
| PPE exch           | X5P <-> RU5P      | 0                | 0    | 100  | 0                   | 0    | 100  | 100                 | 0    | 100  |
| PPI exch           | R5P <-> RU5P      | 100              | 0    | 100  | 100                 | 0    | 100  | 100                 | 0    | 100  |
| PGI exch           | F6P <-> G6P       | 0                | 0    | 100  | 0                   | 0    | 100  | 1                   | 0    | 100  |
| PGM exch           | G6P <-> G1P       | 100              | 0    | 100  | 100                 | 0    | 100  | 100                 | 0    | 100  |
| GS exch            | G1P <-> GLYC      | 100              | 0    | 100  | 0                   | 0    | 100  | 91                  | 0    | 100  |
| GK exch            | GA <-> 3PGA       | 20               | 6    | 79   | 14                  | 6    | 20   | 46                  | 0    | 100  |
| ENO exch           | 3PGA <-> PEP      | 70               | 0    | 100  | 1                   | 0    | 100  | 100                 | 0    | 100  |
| ACO exch           | CIT <-> ICI       | 2                | 1    | 4    | 5                   | 4    | 6    | 6                   | 3    | 9    |
| SDH exch           | SUC <-> FUM       | 100              | 0    | 100  | 2                   | 1    | 2    | 8                   | 4    | 11   |
| FUM exch           | FUM <-> MAL       | 0                | 0    | 3    | 1                   | 0    | 3    | 2                   | 0    | 10   |
| MDH exch           | OAA <-> MAL       | -1               | 0    | 2    | 0                   | 0    | 1    | 0                   | 0    | 2    |
| ALT exch           | PYR <-> ALA       | 100              | 0    | 100  | 0                   | 0    | 4    | 8                   | 0    | 22   |
| LDH exch           | LAC <-> PYR       | 13               | 12   | 16   | 17                  | 15   | 18   | 33                  | 15   | 42   |
| CBS exch           | SER <-> CYST      | 0                | 0    | 2    | 0                   | 0    | 9    | 0                   | 0    | 9    |

**Table S3. Pool sizes determined by <sup>13</sup>C INST-MFA for SA590 (+thiamin), SA590-PK (-thiamin), and SA590-PK (+thiamin).** The 95% confidence bounds on the estimated pool sizes (μmol/gDW) are shown for each strain/condition (n=3). Best-fit estimates of metabolically active pool sizes (as a percentage of total pool) were obtained for 3PGA and PEP based on their MID measurements (Ma et al., 2014).

| Strain (condition)   | SA590 (+thiamin) |       |       | SA590-PK (-thiamin) |       |       | SA590-PK (+thiamin) |       |       |
|----------------------|------------------|-------|-------|---------------------|-------|-------|---------------------|-------|-------|
|                      | Value            | LB95  | UB95  | Value               | LB95  | UB95  | Value               | LB95  | UB95  |
| 2PG pool             | 1E-04            | 0E+00 | 2E-01 | 1E-04               | 0E+00 | 2E-01 | 1E-04               | 0E+00 | 4E-01 |
| 3PGA pool            | 5E+00            | 0E+00 | 8E+00 | 9E-03               | 0E+00 | 2E+00 | 1E-04               | 0E+00 | 1E+01 |
| 3PGA active pool (%) | 70               | 67    | 73    | N/A                 | N/A   | N/A   | 46                  | 43    | 49    |
| ACA pool             | 6E-04            | 0E+00 | 6E+00 | 5E-03               | 0E+00 | 2E+00 | 2E-04               | 0E+00 | 3E+00 |
| AKG pool             | 1E-04            | 0E+00 | ∞     | 1E-04               | 0E+00 | ∞     | 1E-04               | 0E+00 | ∞     |
| ALA pool             | 2E-01            | 0E+00 | 2E+00 | 3E-04               | 3E-04 | 2E+00 | 8E+07               | 0E+00 | ∞     |
| AcLAC pool           | 9E+06            | 0E+00 | ∞     | 9E+06               | 0E+00 | ∞     | 9E+06               | 0E+00 | ∞     |
| CIT pool             | 4E-01            | 0E+00 | 8E-01 | 4E-01               | 0E+00 | 7E-01 | 1E-04               | 0E+00 | 3E+00 |
| CO2 pool             | 6E+00            | 0E+00 | 9E+00 | 1E-04               | 0E+00 | 2E+00 | 2E-04               | 0E+00 | 1E+01 |
| CYST pool            | 3E-01            | 1E-01 | 2E+01 | 9E-01               | 7E-01 | 2E+01 | 4E-01               | 3E-01 | 3E+01 |
| E4P pool             | 2E-03            | 0E+00 | 4E+00 | 1E+00               | 0E+00 | 7E+00 | 5E+00               | 0E+00 | 1E+01 |
| EC2 pool             | 2E-03            | 0E+00 | 6E+00 | 6E-01               | 0E+00 | 9E+00 | 1E-04               | 0E+00 | 8E+00 |
| F6P pool             | 2E-03            | 0E+00 | 3E+00 | 1E-04               | 0E+00 | 8E+00 | 4E-04               | 0E+00 | 7E+00 |
| FBP pool             | 9E-04            | 0E+00 | 3E+00 | 5E+00               | 0E+00 | 8E+00 | 1E-04               | 0E+00 | 7E+00 |
| FUM pool             | 2E+01            | 0E+00 | 3E+01 | 1E-04               | 0E+00 | 4E-01 | 1E-04               | 0E+00 | 5E+00 |
| G1P pool             | 9E-02            | 0E+00 | ∞     | 7E-03               | 0E+00 | 6E+00 | 2E+01               | 0E+00 | ∞     |
| G6P pool             | 5E+06            | 0E+00 | ∞     | 1E-02               | 0E+00 | 4E+00 | 3E-01               | 0E+00 | ∞     |
| GA pool              | 8E+00            | 3E+00 | 1E+01 | 2E+01               | 1E+01 | 3E+01 | 1E+01               | 0E+00 | 2E+01 |
| GLY pool             | 1E-04            | 0E+00 | 2E-01 | 1E-04               | 0E+00 | 2E-01 | 1E-04               | 0E+00 | 4E-01 |
| GLYC pool            | 3E-02            | 0E+00 | ∞     | 6E+01               | 0E+00 | ∞     | 3E-03               | 0E+00 | ∞     |
| IBA pool             | 1E+03            | 0E+00 | ∞     | 1E+03               | 0E+00 | ∞     | 1E+03               | 0E+00 | ∞     |
| ICI pool             | 3E+01            | 1E+01 | ∞     | 5E+01               | 4E+01 | 8E+01 | 4E+01               | 2E+01 | ∞     |
| LAC pool             | 2E+02            | 2E+02 | 4E+02 | 1E+02               | 1E+02 | 1E+02 | 2E+02               | 7E+01 | 3E+02 |
| MAL pool             | 1E+00            | 4E-01 | 4E+00 | 2E+00               | 1E+00 | 6E+00 | 3E+00               | 4E-01 | 2E+02 |
| OAA pool             | 1E-04            | 0E+00 | 2E-01 | 2E-01               | 0E+00 | 6E-01 | 2E+00               | 8E-01 | 4E+00 |
| PEP pool             | 2E-03            | 0E+00 | 1E+01 | 1E-02               | 0E+00 | 2E+00 | 1E-04               | 0E+00 | 1E+01 |
| PEP active pool (%)  | 79               | 75    | 85    | 77                  | 76    | 79    | 59                  | 55    | 64    |
| PYR pool             | 8E-01            | 0E+00 | 2E+00 | 1E-04               | 0E+00 | 7E-01 | 6E+00               | 0E+00 | 1E+01 |
| R5P pool             | 3E-04            | 0E+00 | 3E+00 | 1E-04               | 0E+00 | 1E+00 | 1E-04               | 0E+00 | 5E+00 |
| RU5P pool            | 4E-04            | 0E+00 | 3E+00 | 1E-04               | 0E+00 | 1E+00 | 1E-04               | 0E+00 | 5E+00 |
| RUBP pool            | 2E-04            | 0E+00 | 3E+00 | 1E-04               | 0E+00 | 1E+00 | 1E-04               | 0E+00 | 5E+00 |
| S7P pool             | 1E-03            | 0E+00 | 2E+00 | 1E-04               | 0E+00 | 9E-01 | 1E-04               | 0E+00 | 3E+00 |
| SBP pool             | 1E-04            | 0E+00 | 2E+00 | 1E-04               | 0E+00 | 7E-01 | 1E-04               | 0E+00 | 3E+00 |
| SER pool             | 3E-03            | 0E+00 | 2E-01 | 1E-01               | 9E-02 | 4E+00 | 1E-04               | 0E+00 | 4E-01 |
| SUC pool             | 2E-02            | 0E+00 | 3E+01 | 2E+01               | 1E+01 | 2E+01 | 2E+01               | 9E+00 | 3E+01 |
| TP pool              | 2E-03            | 0E+00 | 6E+00 | 1E-04               | 0E+00 | 2E+00 | 1E-04               | 0E+00 | 8E+00 |
| X5P pool             | 8E-04            | 0E+00 | 3E+00 | 1E-04               | 0E+00 | 1E+00 | 1E-04               | 0E+00 | 6E+00 |

**Table S4. Sum-of-squared residuals (SSR) and their expected ranges for SA590 (+thiamin), SA590-PK (-thiamin), and SA590-PK (+thiamin). All fits were accepted based on the chi-square test.**

| Strain (condition) | SA590 (+thiamin) |         | SA590-PK (-thiamin) |         | SA590-PK (+thiamin) |         |
|--------------------|------------------|---------|---------------------|---------|---------------------|---------|
| SSR                | 162.4            |         | 152.2               |         | 109.4               |         |
| Expected range     | 110.9            | - 176.9 | 94.2                | - 155.7 | 102.1               | - 165.7 |

**Table S5. Plasmids generated in this study.**

| <b>Plasmid</b>     | <b>Description</b>                                                                                                                                               |
|--------------------|------------------------------------------------------------------------------------------------------------------------------------------------------------------|
| pPK- $\alpha$ PdhB | <i>lac</i> operon-regulated expression of <i>pk</i> <sub>7942</sub> (SYNPCC7942_0098) and <i>apdhB</i> antisense sequence targeted to NS3 (Cb <sup>R</sup> )     |
| pCX0104-LuxAB-FT   | Zn <sup>++</sup> -inducible expression of P <sub>smtA</sub> :: <i>luxAB</i> ::3 $\times$ FLAG targeted to NS4 (Cm <sup>R</sup> )                                 |
| pCX0104-PK         | Zn <sup>++</sup> -inducible expression of P <sub>smtA</sub> :: <i>pk</i> <sub>7942</sub> (SYNPCC7942_0098) targeted to NS4 (Cm <sup>R</sup> )                    |
| pCX0104-ALS        | Zn <sup>++</sup> -inducible expression of P <sub>smtA</sub> :: <i>alsS</i> ( <i>alsS</i> originally from <i>B. subtilis</i> ) targeted to NS4 (Cm <sup>R</sup> ) |
| pCX0104-PCK        | Zn <sup>++</sup> -inducible expression of P <sub>smtA</sub> :: <i>pckA</i> <sub>E.coli</sub> (EG10759) targeted to NS4 (Cm <sup>R</sup> )                        |
| pCX0104-PCK-FT     | Zn <sup>++</sup> -inducible expression of P <sub>smtA</sub> :: <i>pckA</i> ::3 $\times$ FLAG targeted to NS4 (Cm <sup>R</sup> )                                  |

Refer to *Materials and Methods* for further details.

**Table S6. Relevant primers used in this study.**

| <b>Primer name</b>       | <b>Sequence (5' to 3')</b>                            | <b>Description</b>                                             |
|--------------------------|-------------------------------------------------------|----------------------------------------------------------------|
| PK 5' <i>SpeI</i>        | GCC <u>ACT AGT</u> TGT CAT GCA ACC CAA CGA CTT TCA G  | PCR of <i>pk</i> from PCC 7942                                 |
| PK 3' <i>XbaI</i>        | ACT <u>TCT AGA</u> TTA GAC GGA AAT CGG CTG CTC GGC AG | PCR of <i>pk</i> from PCC 7942                                 |
| ALS 5' <i>SpeI</i>       | GCC <u>ACT AGT</u> TGT CAT GTT GAC AAA AGC AAC        | PCR of <i>alsS</i> from pSA126 (Atsumi et al., 2009)           |
| ALS 3' <i>BamHI</i>      | ATA <u>GGA TCC</u> CTA GAG AGC TTT CGT TTT CAT GAG    | PCR of <i>alsS</i> from pSA126 (Atsumi et al., 2009)           |
| PCK 5' <i>SpeI</i>       | GCC <u>ACT AGT</u> TGT CAT GCG CGT TAA CAA TGG TTT G  | PCR of <i>pckA</i> from <i>E. coli</i>                         |
| PCK 3' <i>BamHI</i>      | ATT <u>GGA TCC</u> TTA CAG TTT CGG ACC AGC CGC TAC    | PCR of <i>pckA</i> from <i>E. coli</i>                         |
| PCK 3' <i>KpnI</i>       | ATT <u>GGT ACC</u> CAG TTT CGG ACC AGC CGC TAC        | PCR of <i>pckA</i> from <i>E. coli</i>                         |
| 5' Sequencing primer     | TTG GCA GAC TAC CGT CTC TCC GTC                       | Sequencing of constructs derived from pCX0104-ILuxAB           |
| 3' Sequencing primer     | GCA GCC TGC TCT CTG GGA GTT TGA C                     | Sequencing of constructs derived from pCX0104-ILuxAB           |
| 5' PCK sequencing primer | ACT TCG TGG CGT TTA ACC TGA C                         | Sequencing of <i>pckA</i> insertion into pCX0104 backbone.     |
| 5' 7942 PCR primer       | TCT TGC TCT GAC GCC TTA TTC                           | PCR to confirm insertion of target genes in PCC 7942           |
| 3' 7942 PCR primer       | ATC GTC CCA AGA TCC AGA ATG T                         | PCR to confirm insertion of target genes in PCC 7942           |
| <i>rnpB</i> forward      | TGC TTG CAG GCA CAG GTA AG                            | RT-qPCR of house-keeping gene <i>rnpB</i> (Huang et al., 2016) |
| <i>rnpB</i> reverse      | CCT CTA GCG GTC CAT AAA CGG                           | RT-qPCR of house-keeping gene <i>rnpB</i> (Huang et al., 2016) |
| <i>pdhB</i> forward      | TCG TCA TCG TTG AAG AAT GC                            | RT-qPCR of <i>pdhB</i>                                         |
| <i>pdhB</i> reverse      | GGT TTT CTA GCT TGC CGT TG                            | RT-qPCR of <i>pdhB</i>                                         |
| <i>pdhA</i> forward      | AAG GCC CGA CAC TGA TTG AG                            | RT-qPCR of <i>pdhA</i>                                         |
| <i>pdhA</i> reverse      | GAG ATC GCA AAT TCC ACC GC                            | RT-qPCR of <i>pdhA</i>                                         |
| <i>pdhB-F</i>            | AT <u>GGATCC</u> GCTGAAAGCAAACGATGGAAGC               | PCR of flanking region of <i>pdhB</i> start codon              |
| <i>pdhB-R</i>            | GT <u>GGATCC</u> CAGAGGTCTTTGGTGACTTTATA              | PCR of flanking region of <i>pdhB</i> start codon              |

Restriction cut sites are underlined. Translation start and stop codons are highlighted in red.

# Supplemental Figures



Fig. S1

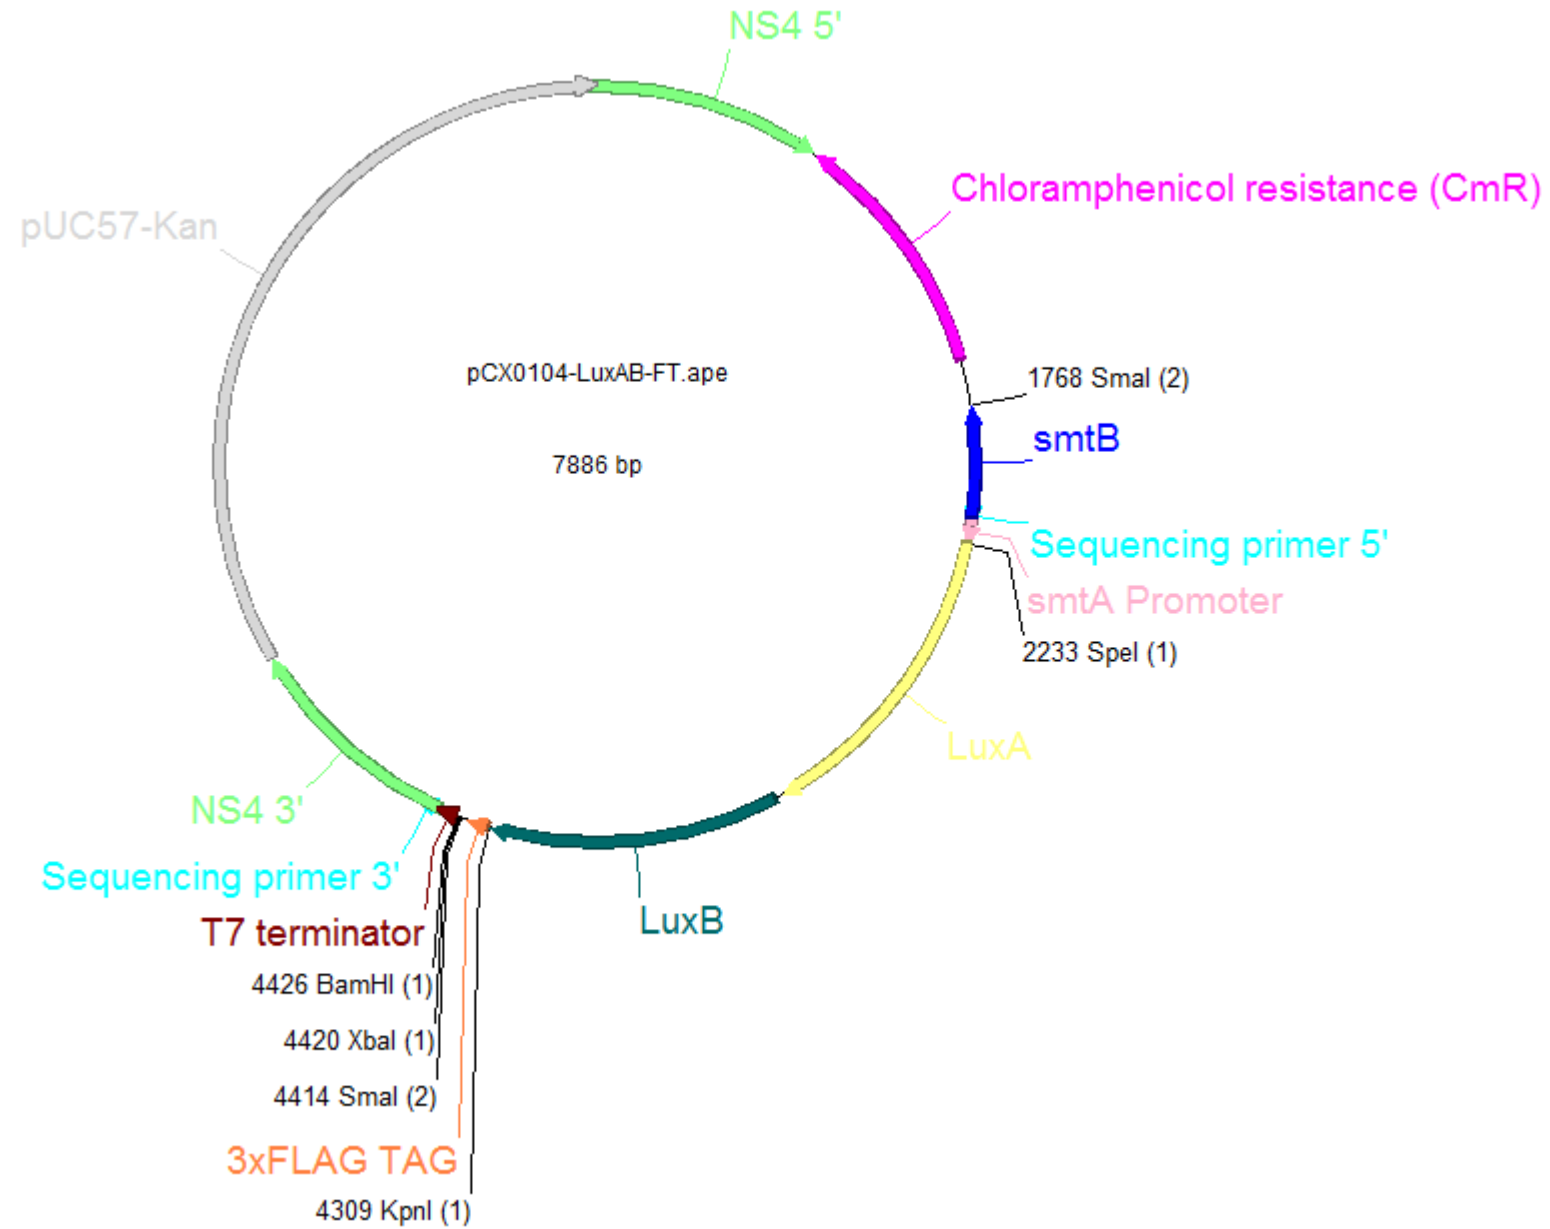

# Fig. S2

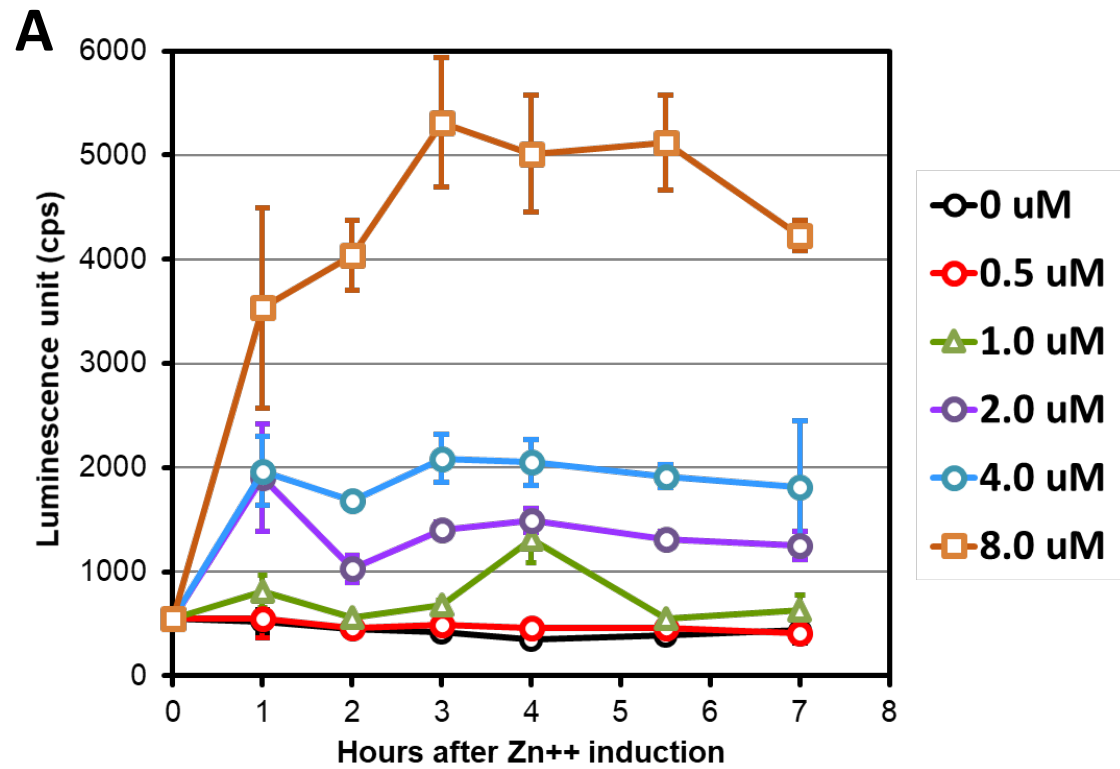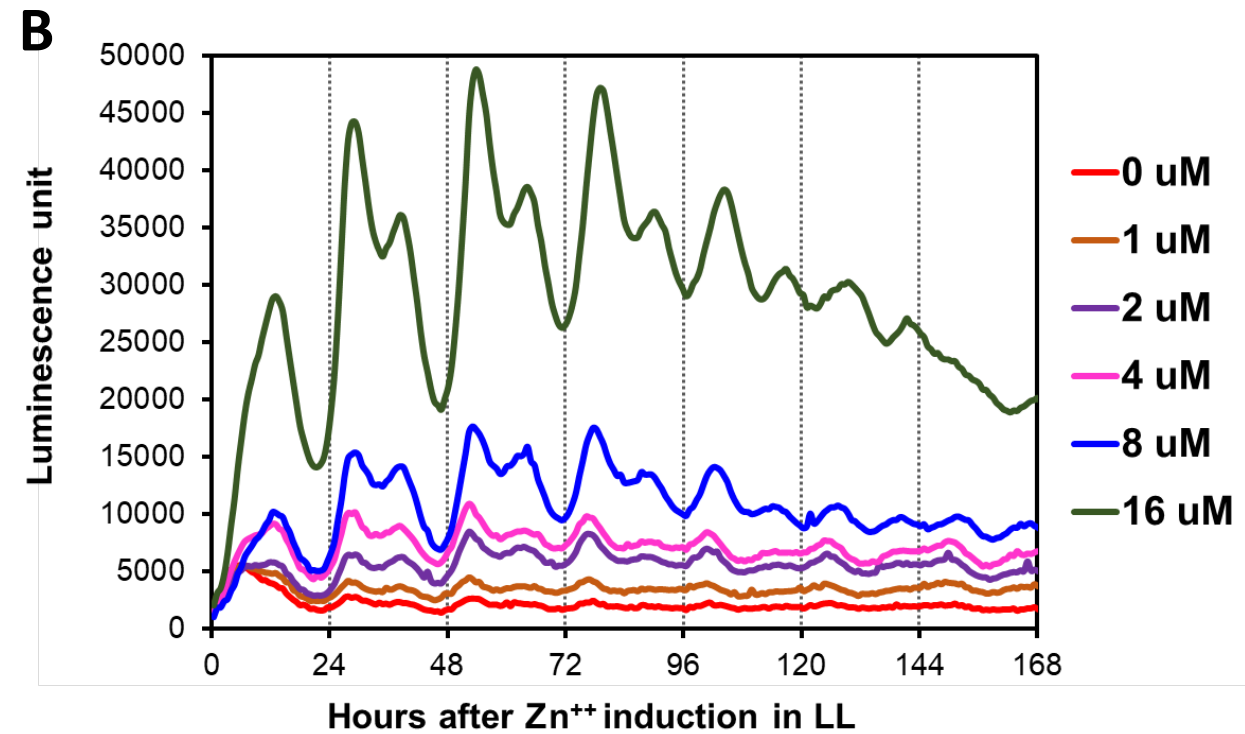

Fig. S3

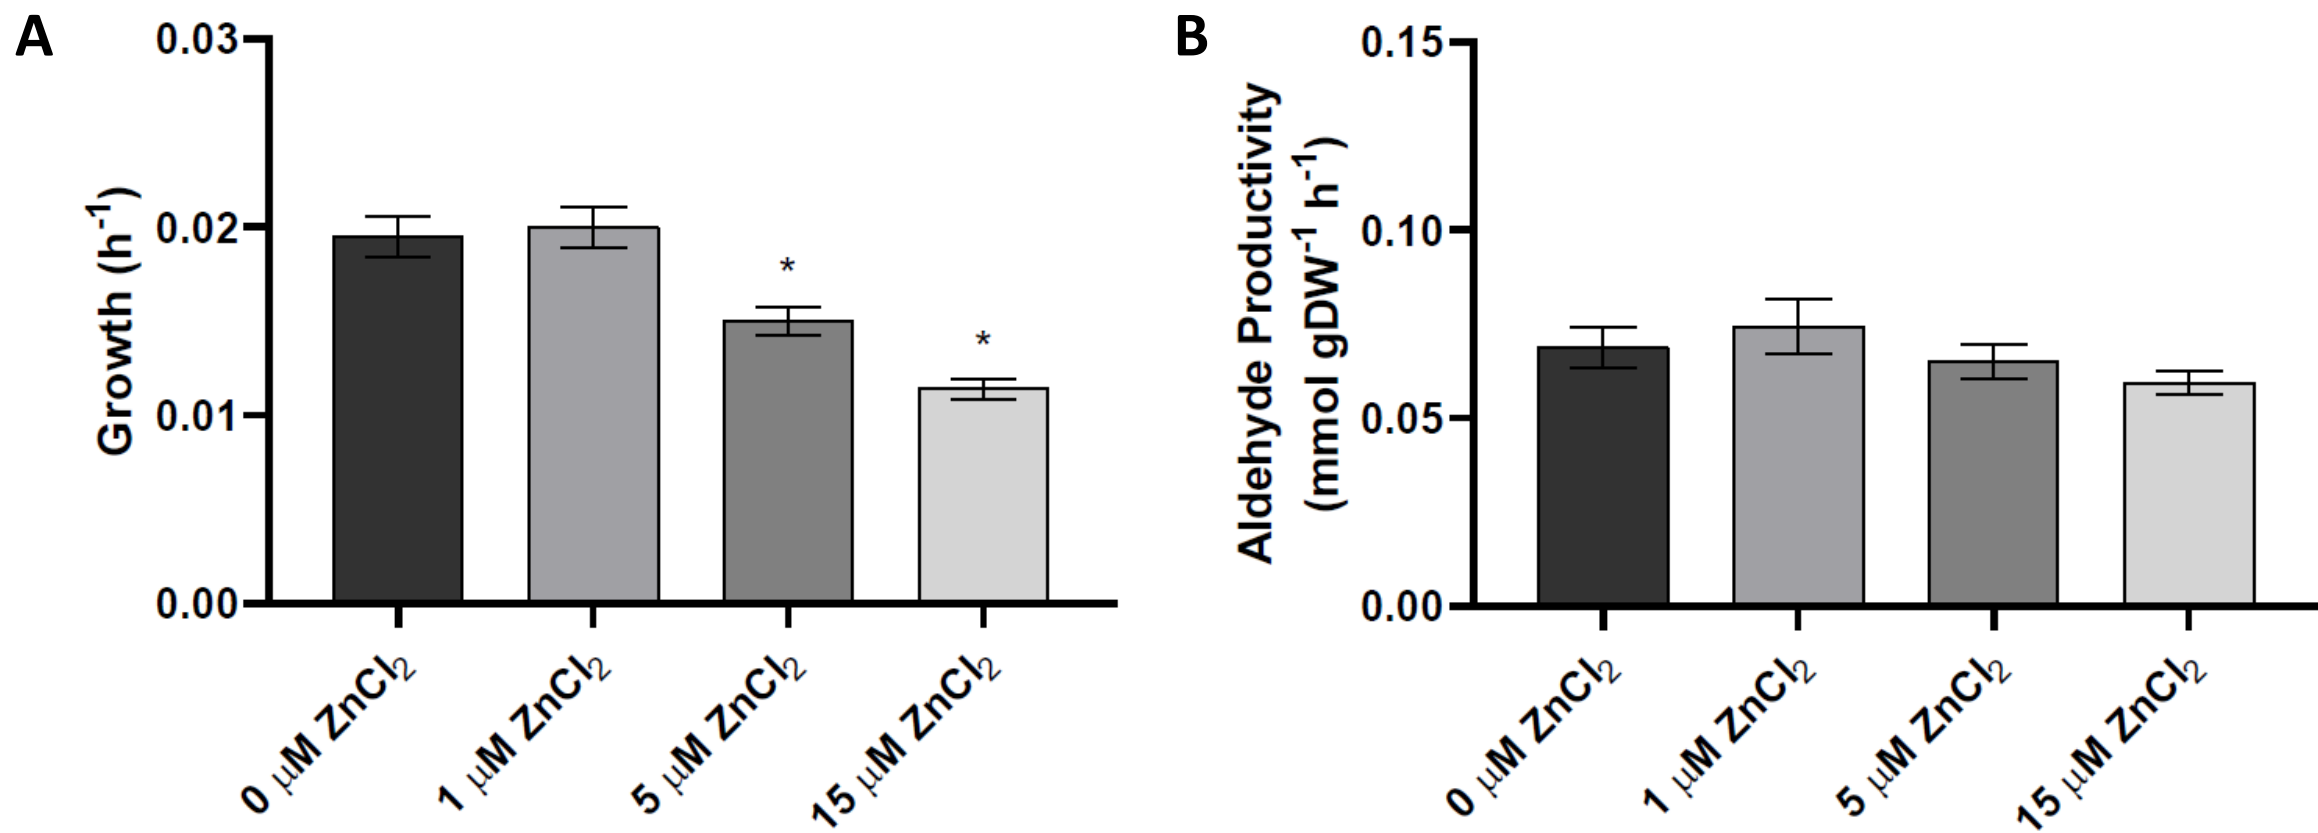

Fig. S4

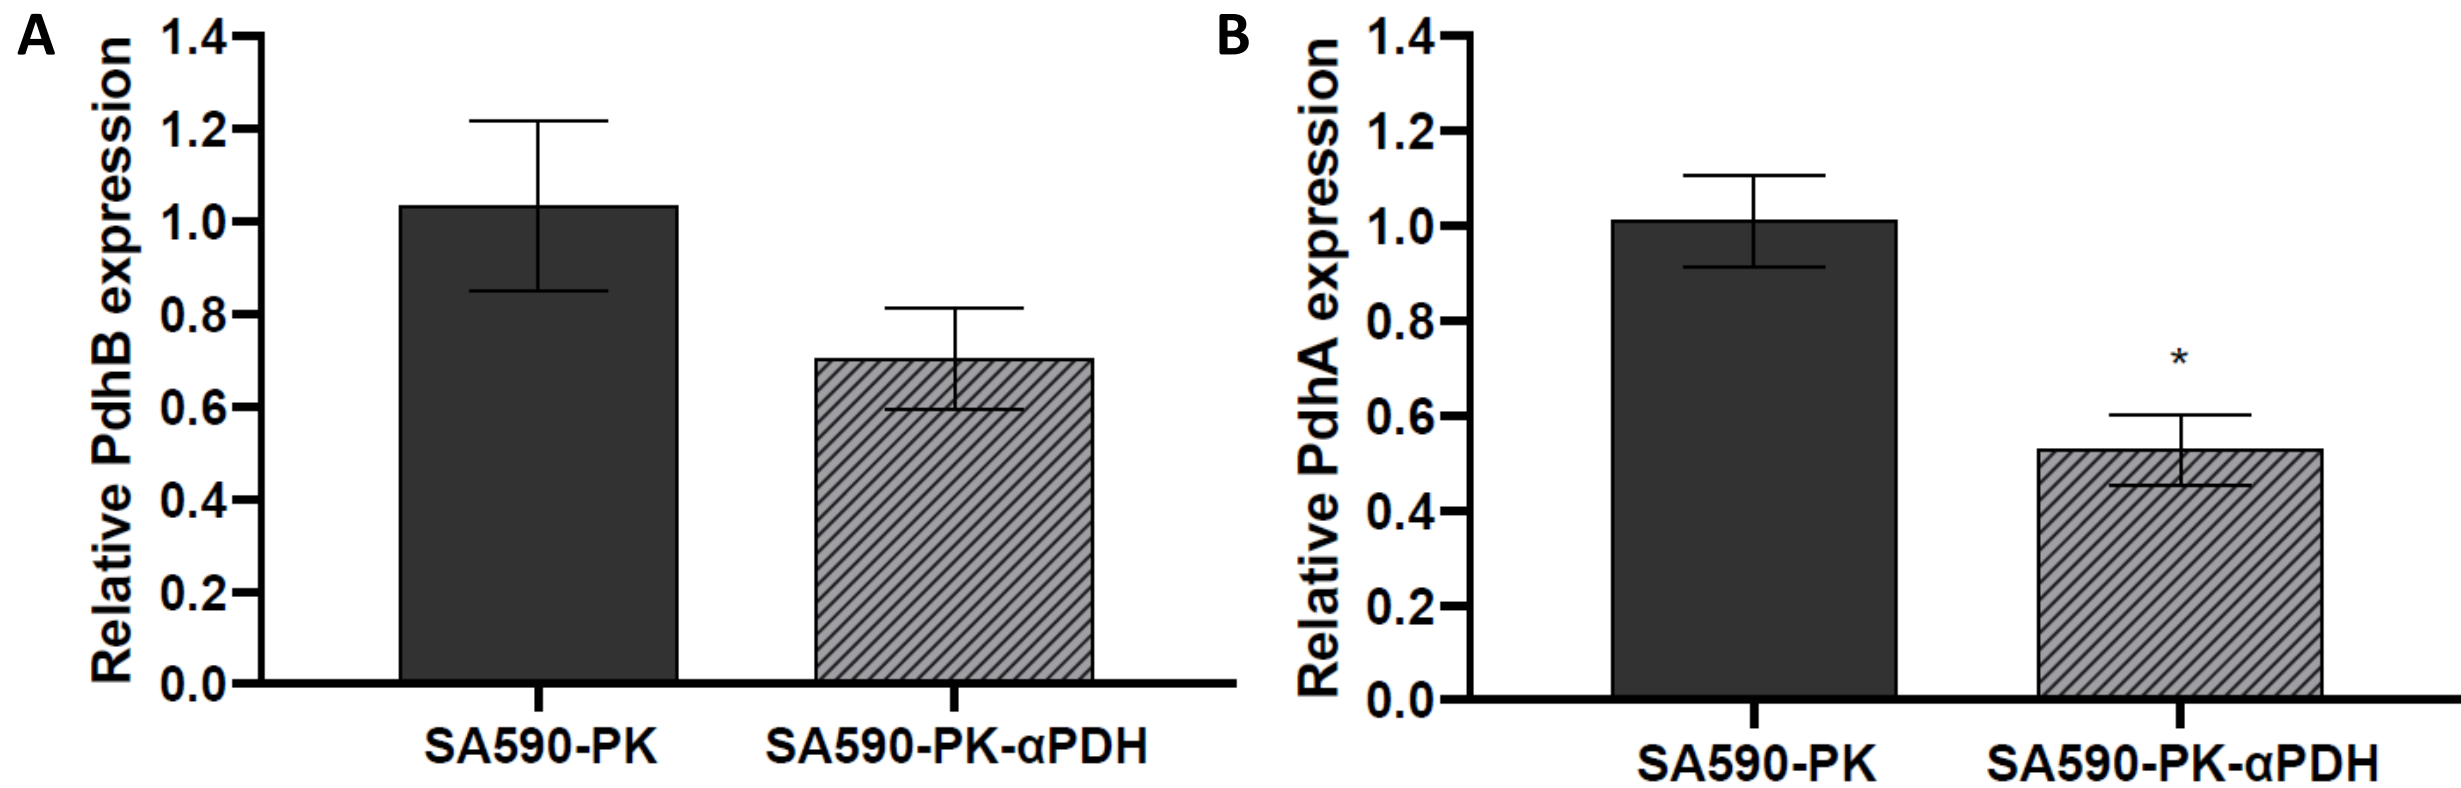

Fig. S5

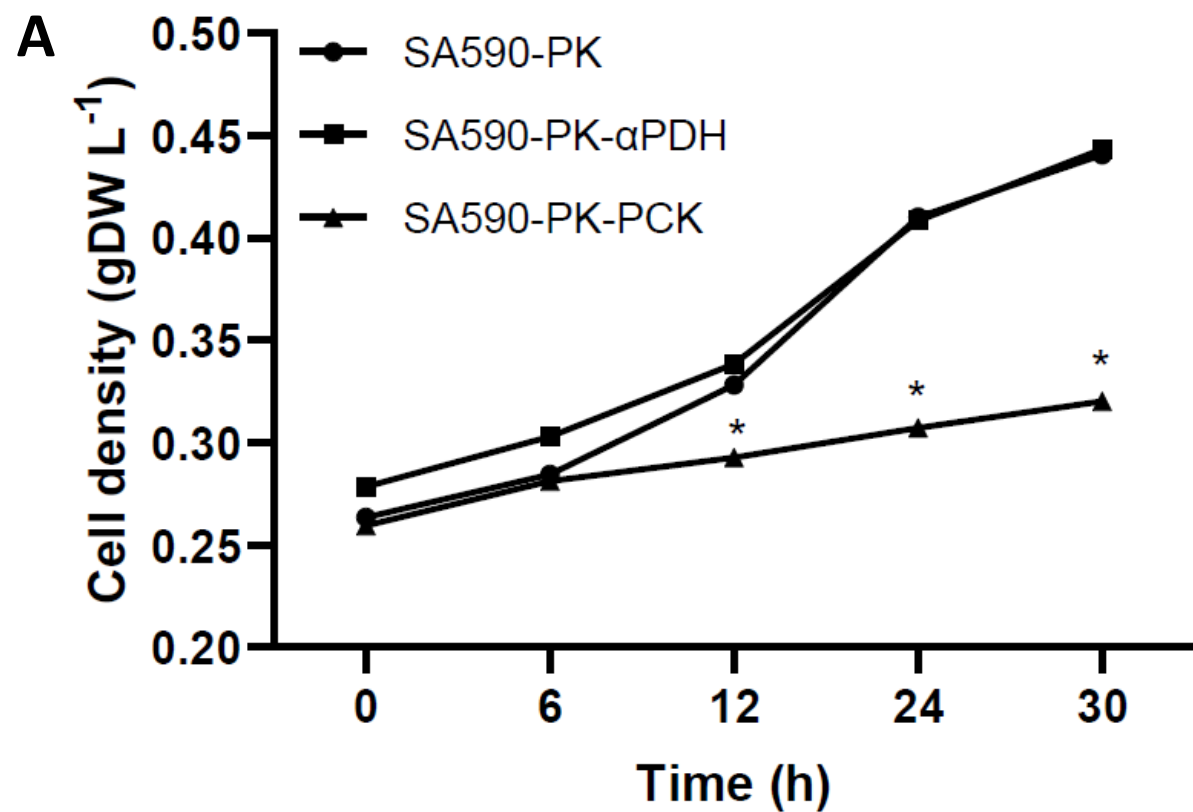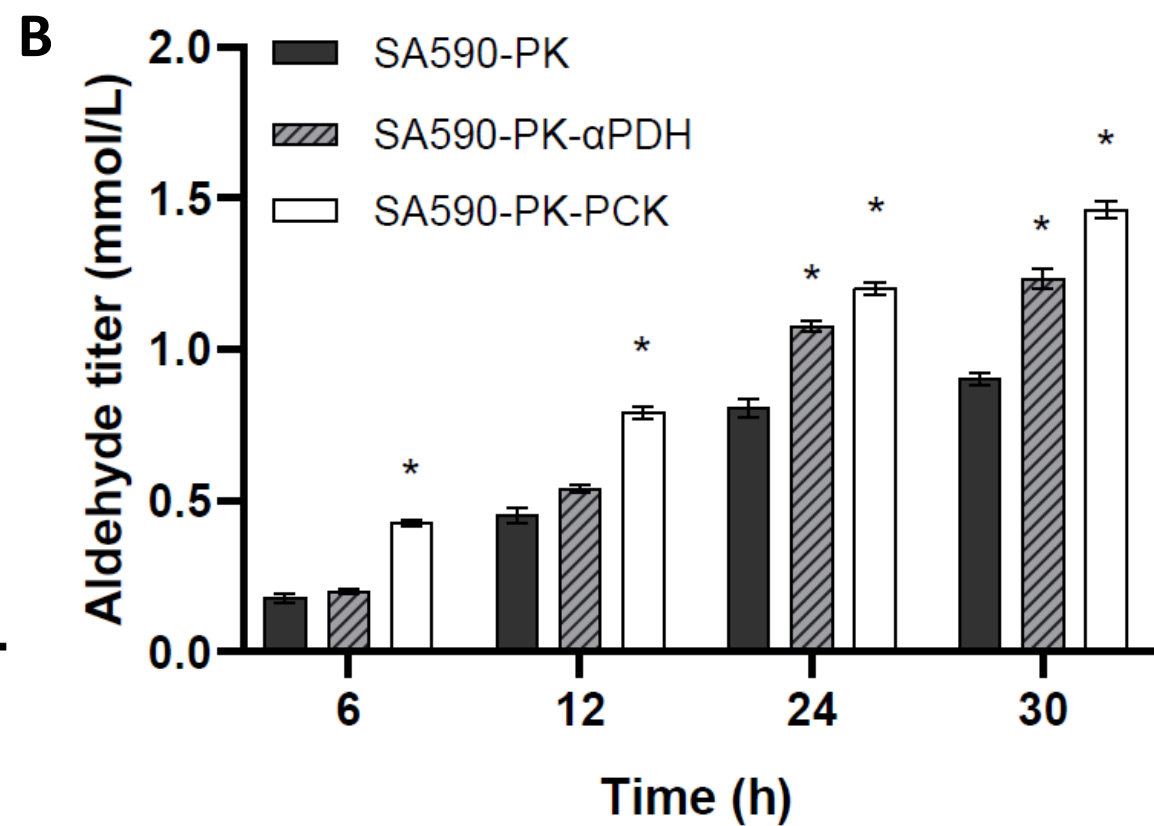

Fig. S6

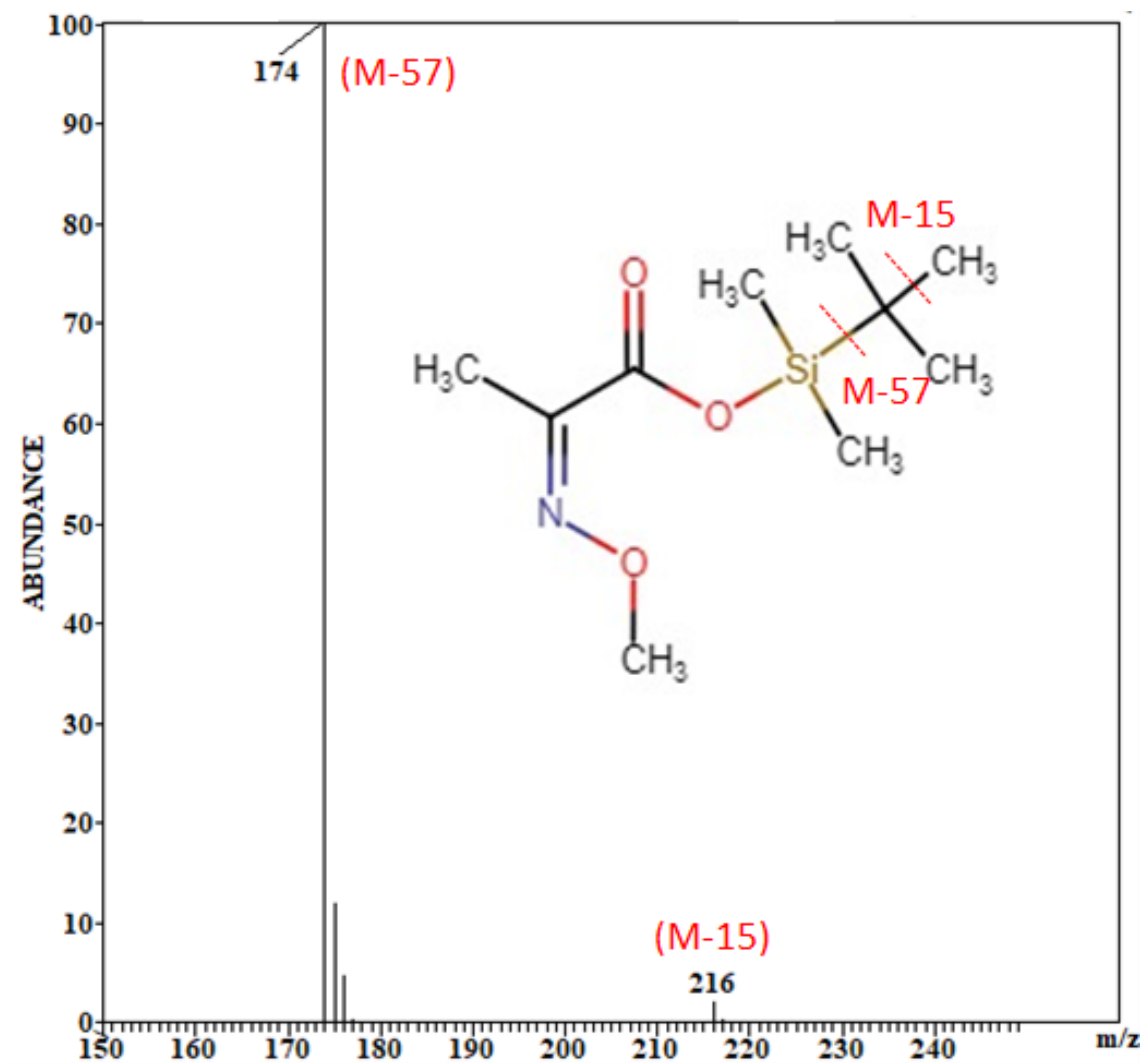

Fig. S7

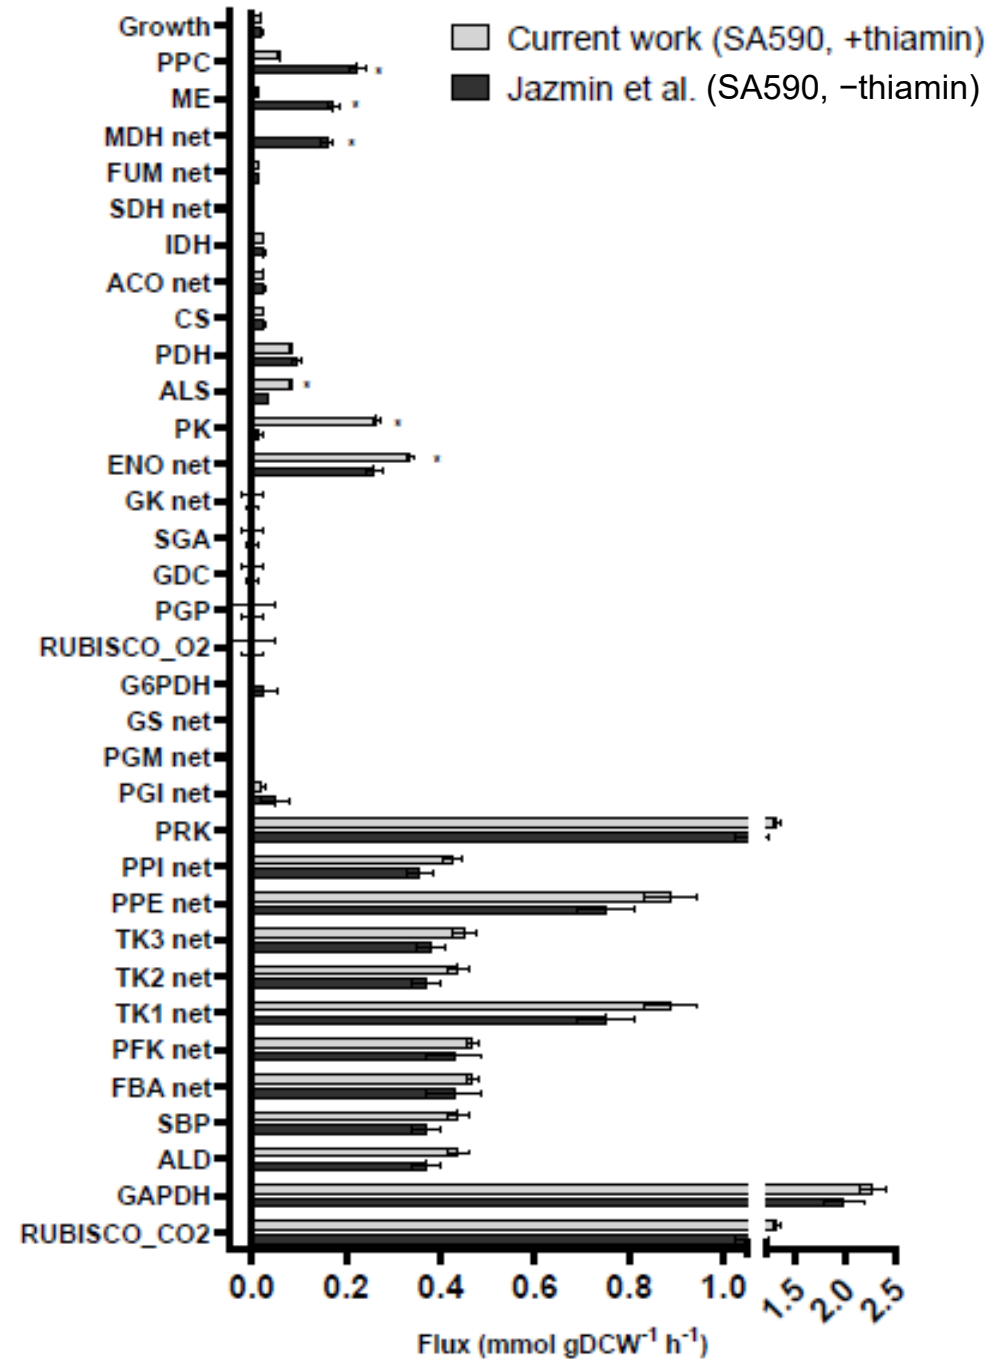

# Fig. S8

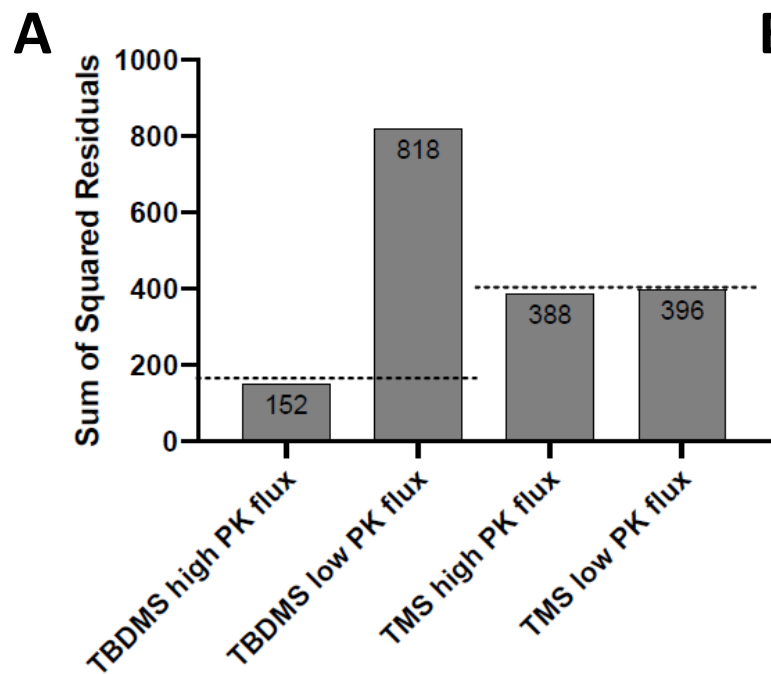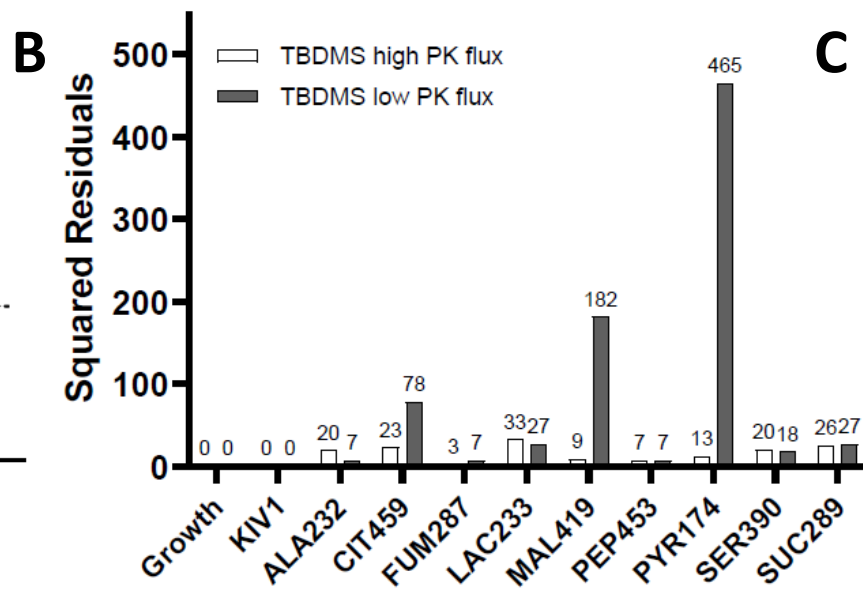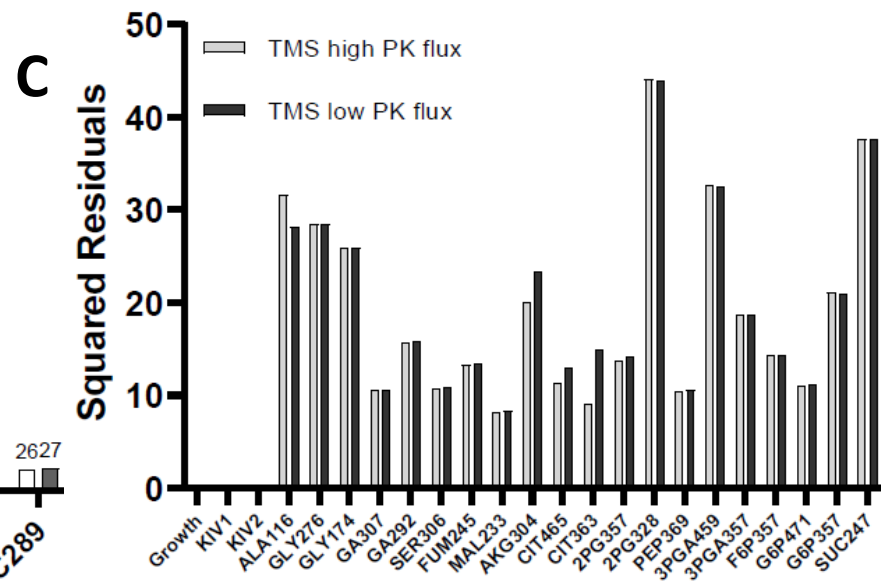

Supplement: NIHMS1583844-supplement-Supplement.pdf [file NIHMS1583844-supplement-Supplement.pdf]
